# Supplementary material for: TRPML2 is an osmo/mechanosensitive cation channel in endolysosomal organelles
Source: PubMed Central journal article supplement (PMC7673730; doi:10.1126/sciadv.abb5064), 2020-11-11
Supplement: supp_6_46_eabb5064__1.pdf [file supp_6_46_eabb5064__1.pdf]

## Supplementary Materials for

### **TRPML2 is an osmo/mechanosensitive cation channel in endolysosomal organelles**

Cheng-Chang Chen\*, Einar Krogsaeter, Elisabeth S. Butz, Yanfen Li, Rosa Puertollano,  
Christian Wahl-Schott, Martin Biel\*, Christian Grimm\*

\*Corresponding author. Email: [cheng-chang.chen@cup.uni-muenchen.de](mailto:cheng-chang.chen@cup.uni-muenchen.de) (C.-C.C.); [mbiel@cup.uni-muenchen.de](mailto:mbiel@cup.uni-muenchen.de) (M.B.);  
[christian.grimm@med.uni-muenchen.de](mailto:christian.grimm@med.uni-muenchen.de) (C.G.)

Published 11 November 2020, *Sci. Adv.* **6**, eabb5064 (2020)  
DOI: 10.1126/sciadv.abb5064

#### **The PDF file includes:**

Figs. S1 to S6  
Legends for movies S1 to S6

#### **Other Supplementary Material for this manuscript includes the following:**

(available at [advances.sciencemag.org/cgi/content/full/6/46/eabb5064/DC1](https://advances.sciencemag.org/cgi/content/full/6/46/eabb5064/DC1))

Movies S1 to S6

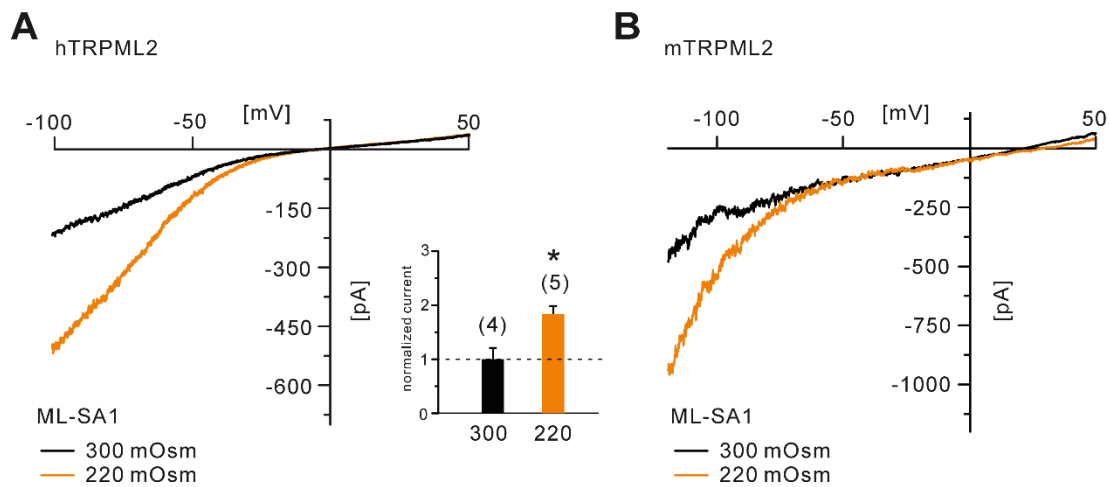

**Fig. S1. Hypotonicity further increases ML-SA1 evoked TRPML2 currents.** Hypotonic stimulation further increases ML-SA1 (10 $\mu$ M) evoked human TRPML2 currents (**A**) and mouse TRPML2 currents (**B**) in LE/LY isolated from hTRPML2- or mTRPML2-overexpressing HEK293 cells. The number of patched individual organelles is indicated in parentheses. Data are represented as mean  $\pm$  SEM. \* indicates  $p < 0.05$ , Student's t-test, unpaired.

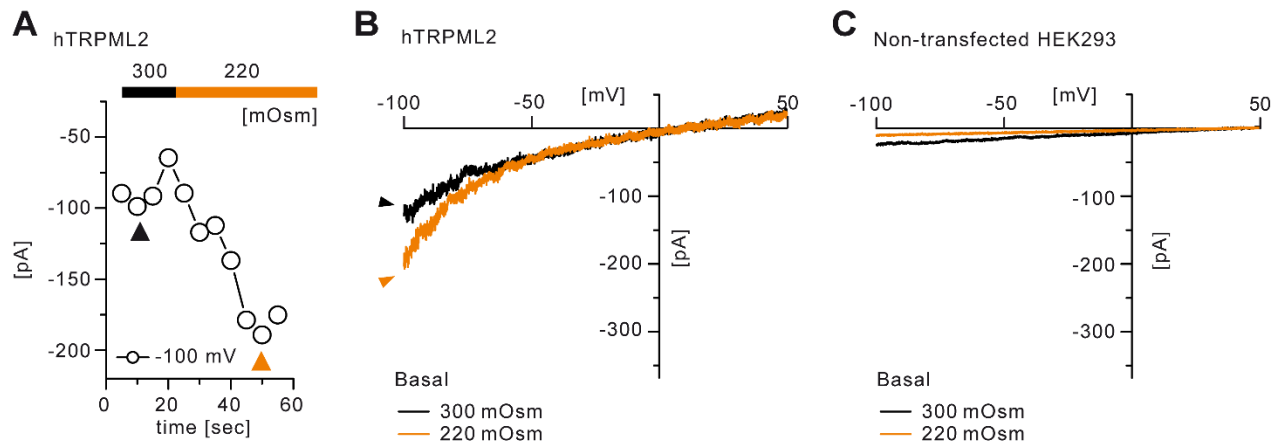

**Fig. S2. Hypotonicity evoked TRPML2 currents in the absence of exogenously administered agonists.** (A) Time-course of whole LE/LY recording (LE/LY isolated from human TRPML2-overexpressing HEK293 cells) in the absence of TRPML2 agonists using ramp protocols. Recordings at indicated time points were used for the I-V plot in (B). (C) No significant hypotonicity evoked currents were observed in LE/LY isolated from non-transfected HEK293 cells.

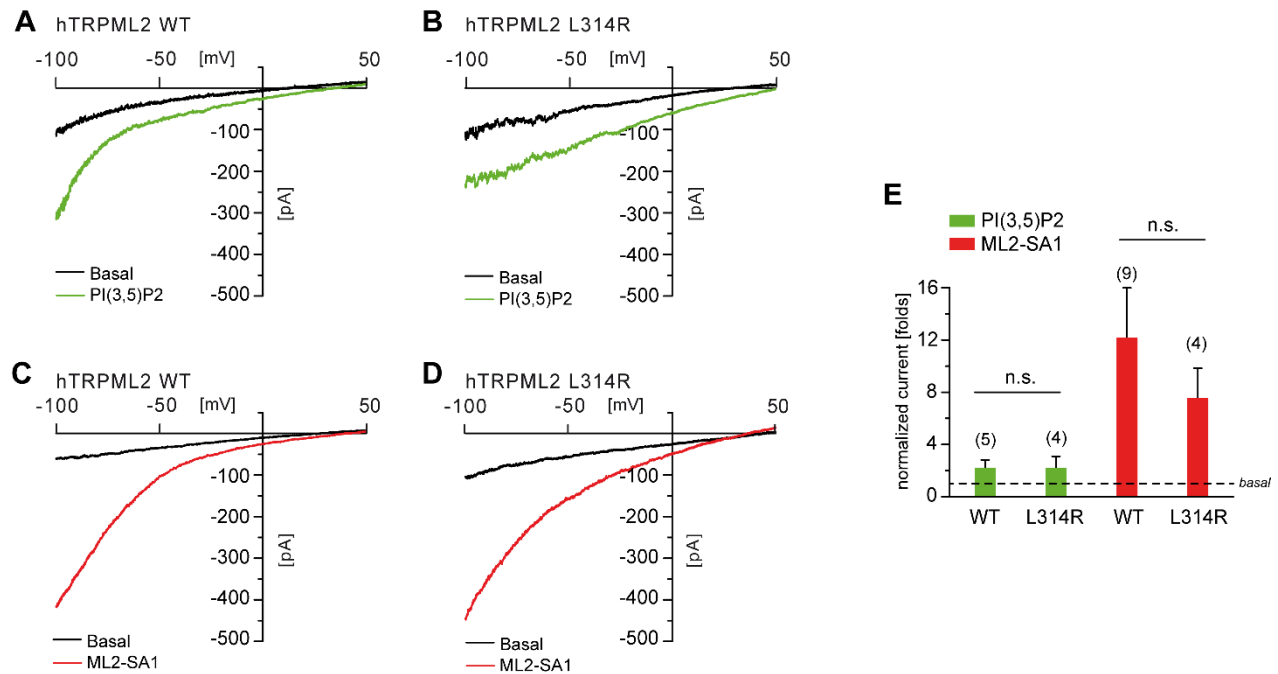

**Fig. S3. Endogenous and small molecule agonist evoked TRPML2 L314R currents.** 1 $\mu$ M PI(3,5)P<sub>2</sub> (A-B) and 10 $\mu$ M ML2-SA1 (C-D) evoked TRPML2 currents in LE/LY isolated from hTRPML2 WT (A, C) and L314R (B, D) overexpressing HEK293 cells. (E) Statistical summary of data as shown in A-D as fold increase compared to the respective current before agonist application, each. The number of patched individual organelles is indicated in parentheses. Data are represented as mean  $\pm$  SEM. n.s. indicates no significant difference, Student's t-test, unpaired.

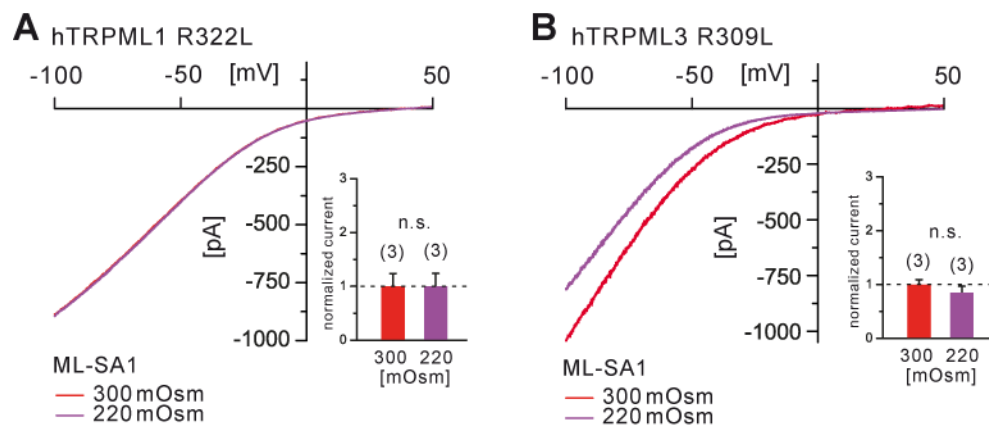

**Fig. S4. Mutating TRPML1 or TRPML3 at the positions equivalent to L314 in TRPML2 (R322L and R309L).** Whole-LE/LY recordings of ML-SA1 (10 $\mu$ M) elicited inward cation currents under isotonic or hypotonic conditions from TRPML1 R322L (A) and TRPML3 R309L (B) expressing HEK293 cells. Data are represented as mean  $\pm$  SEM.

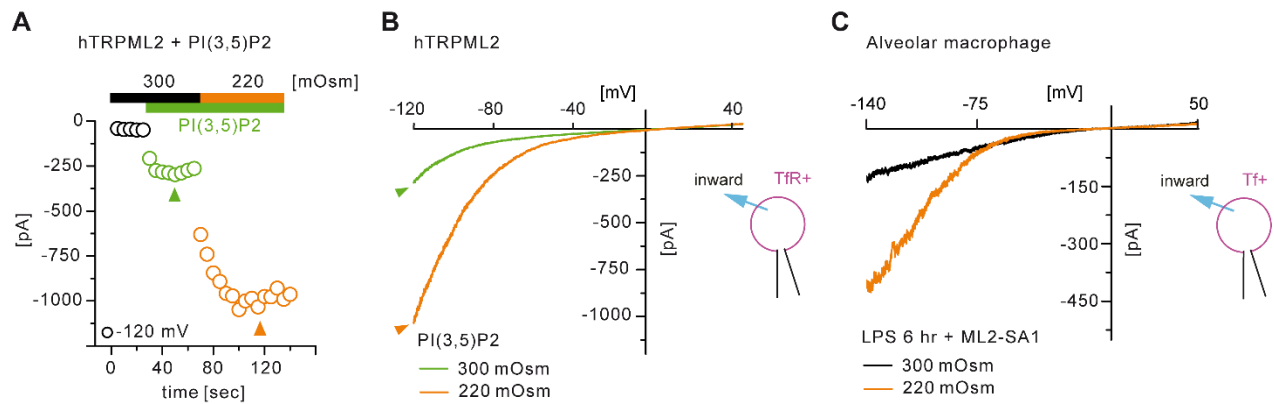

**Fig. S5. Hypotonicity evoked TRPML2 currents in RE isolated from either human TRPML2 overexpressing HEK293 cells or endogenously expressing, LPS-activated macrophages. (A)** Time-course of whole-RE (TfR+) currents elicited with PI(3,5)P<sub>2</sub> under isotonic versus hypotonic conditions. Recordings at the indicated time points were used for I-V relationships in (B). (C) Representative TRPML2-like currents recorded from transferrin (Tf) loaded RE isolated from LPS-stimulated alveolar macrophages after activation with ML2-SA1 in isotonic versus hypotonic solution.

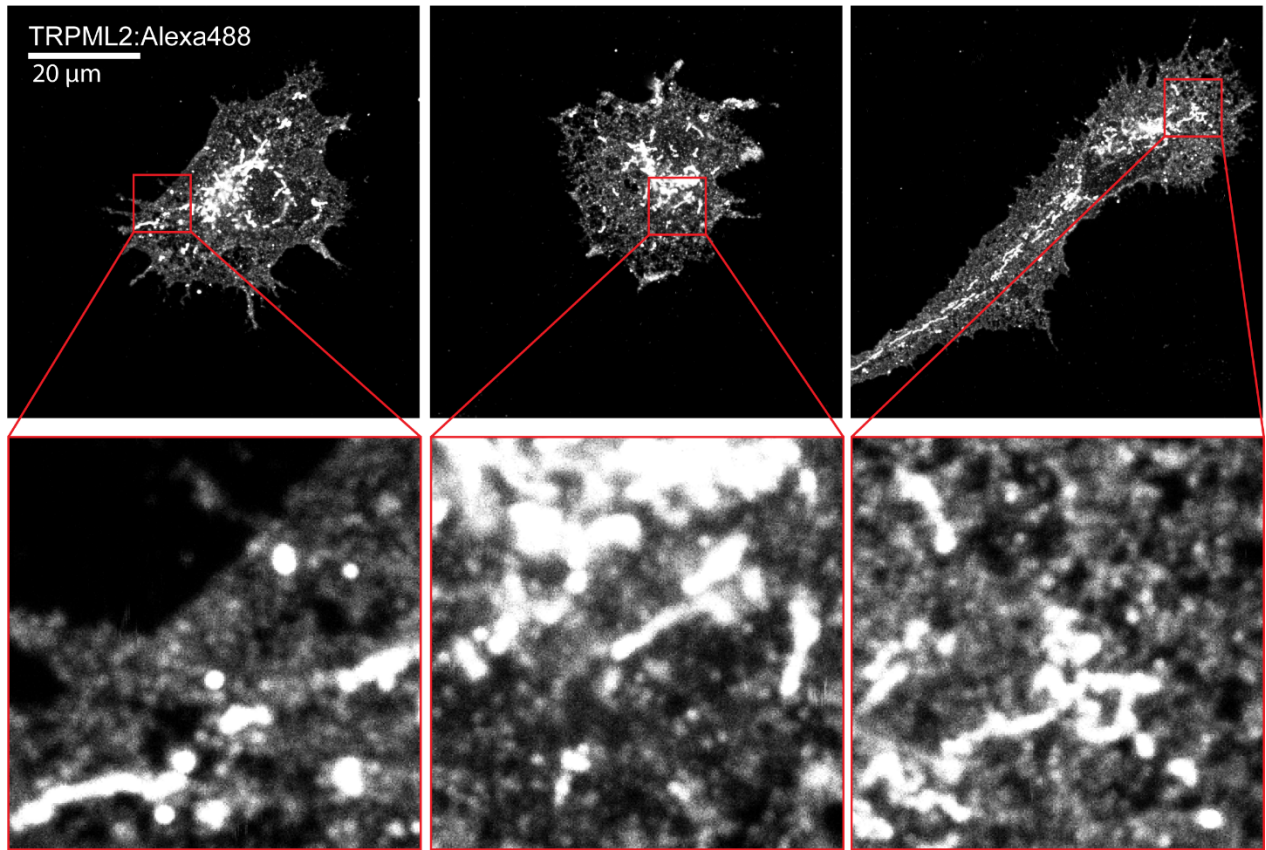

**Fig. S6. Endogenously expressed TRPML2 localizes to tubular structures in LPS-stimulated bone marrow-derived macrophages.** Primary murine bone marrow-derived macrophages were differentiated *in vitro* and stimulated with LPS to facilitate TRPML2 expression as previously described (18, 21). Macrophages were fixed and stained for TRPML2, revealing both punctate vesicular and elongated tubular staining patterns.

**Movie S1. 3D rendering of transferrin-loaded WT TRPML2-expressing cell.** The video shows a 360° rotation of a 8 x 8 x 19.1 μm field-of-view, indicating WT TRPML2-expressing endosomes (green) loaded with Alexa555-conjugated transferrin (red).

**Movie S2. 3D rendering of transferrin-loaded L314R TRPML2-expressing cell.** The video shows a 360° rotation of a 8 x 8 x 13.1 μm field-of-view, indicating L314R TRPML2-expressing endosomes (green) loaded with Alexa555-conjugated transferrin (red).

**Movie S3. 3D rendering of transferrin-loaded WT TRPML2-expressing cell chased for 3 minutes.** The video shows a 360° rotation of a 8 x 8 x 17.4 μm field-of-view, indicating WT TRPML2-expressing endosomes (green) loaded with Alexa555-conjugated transferrin (red), and chased for 3 minutes in the presence of 30 μM ML2-SA1 and unconjugated transferrin

**Movie S4. 3D rendering of transferrin-loaded L314R TRPML2-expressing cell chased for 3 minutes.** The video shows a 360° rotation of a 8 x 8 x 14.4 μm field-of-view, indicating L314R TRPML2-expressing endosomes (green) loaded with Alexa555-conjugated transferrin (red), and chased for 3 minutes in the presence of 30 μM ML2-SA1 and unconjugated transferrin

**Movie S5. 3D rendering of transferrin-loaded WT TRPML2-expressing cell chased for 10 minutes.** The video shows a 360° rotation of a 8 x 8 x 13.1 μm field-of-view, indicating WT TRPML2-expressing endosomes (green) loaded with Alexa555-conjugated transferrin (red), and chased for 10 minutes in the presence of 30 μM ML2-SA1 and unconjugated transferrin

**Movie S6. 3D rendering of transferrin-loaded L314R TRPML2-expressing cell chased for 10 minutes.** The video shows a 360° rotation of a 8 x 8 x 15.4 μm field-of-view, indicating L314R TRPML2-expressing endosomes (green) loaded with Alexa555-conjugated transferrin (red), and chased for 10 minutes in the presence of 30 μM ML2-SA1 and unconjugated transferrin.
